# Supplementary material for: Enumerating Antibiotic Susceptibility Patterns of Pseudomonas aeruginosa Isolated from Different Sources in Dhaka City
Source: PubMed Central journal article supplement (PMC5997856; doi:10.2174/1874285801812010172), 2018-05-31
Supplement: TOMICROJ-12-172_SD.pdf [file TOMICROJ-12-172_SD.pdf]

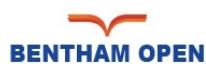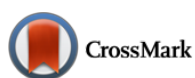

# The Open Microbiology Journal

## Supplementary Material

Content list available at: [www.benthamopen.com/TOMICROJ/](http://www.benthamopen.com/TOMICROJ/)

DOI: 10.2174/1874285801812010172

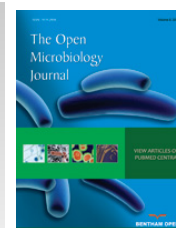

## Enumerating Antibiotic Susceptibility Patterns of *Pseudomonas aeruginosa* Isolated from Different Sources in Dhaka City

Mahmudullah Bhuiya<sup>1</sup>, Mohammad K. I. Sarkar<sup>2</sup>, Mehadi H. Sohag<sup>3</sup>, Hafij Ali<sup>2,\*</sup>, Chapol K. Roy<sup>4</sup>, Lutfu Akther<sup>5</sup> and Abu F. Sarker<sup>6</sup>

<sup>1</sup>Stamford University, Bangladesh

<sup>2</sup>Independent University, Bangladesh (IUB), Bashundhara R/A, Dhaka-1212, Bangladesh

<sup>3</sup>Jagannath University, Bangladesh

<sup>4</sup>Bangladesh Council of Scientific and Industrial Research (BCSIR), Bangladesh

<sup>5</sup>Dhaka Medical College Hospital, Bangladesh

<sup>6</sup>Rajshahi University, Bangladesh

Received: February 15, 2018

Revised: May 04, 2018

Accepted: May 07, 2018

### Microscopic Observation of *Pseudomonas aeruginosa*

All the isolates were Gram-negative, short rod shaped which are similar to *Pseudomonas* spp.

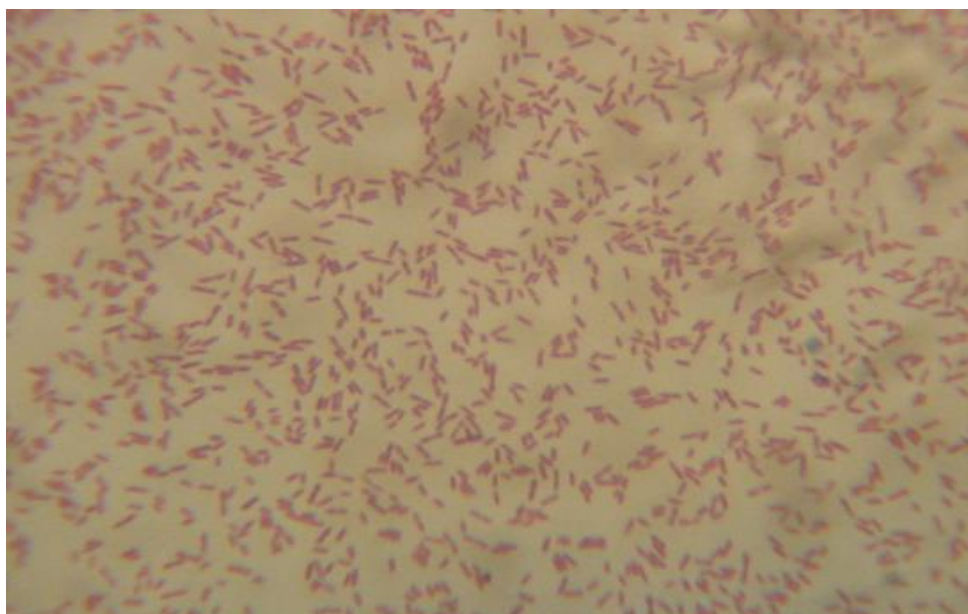

**Fig. (1).** Gram-staining of the of *Pseudomonas* isolate.

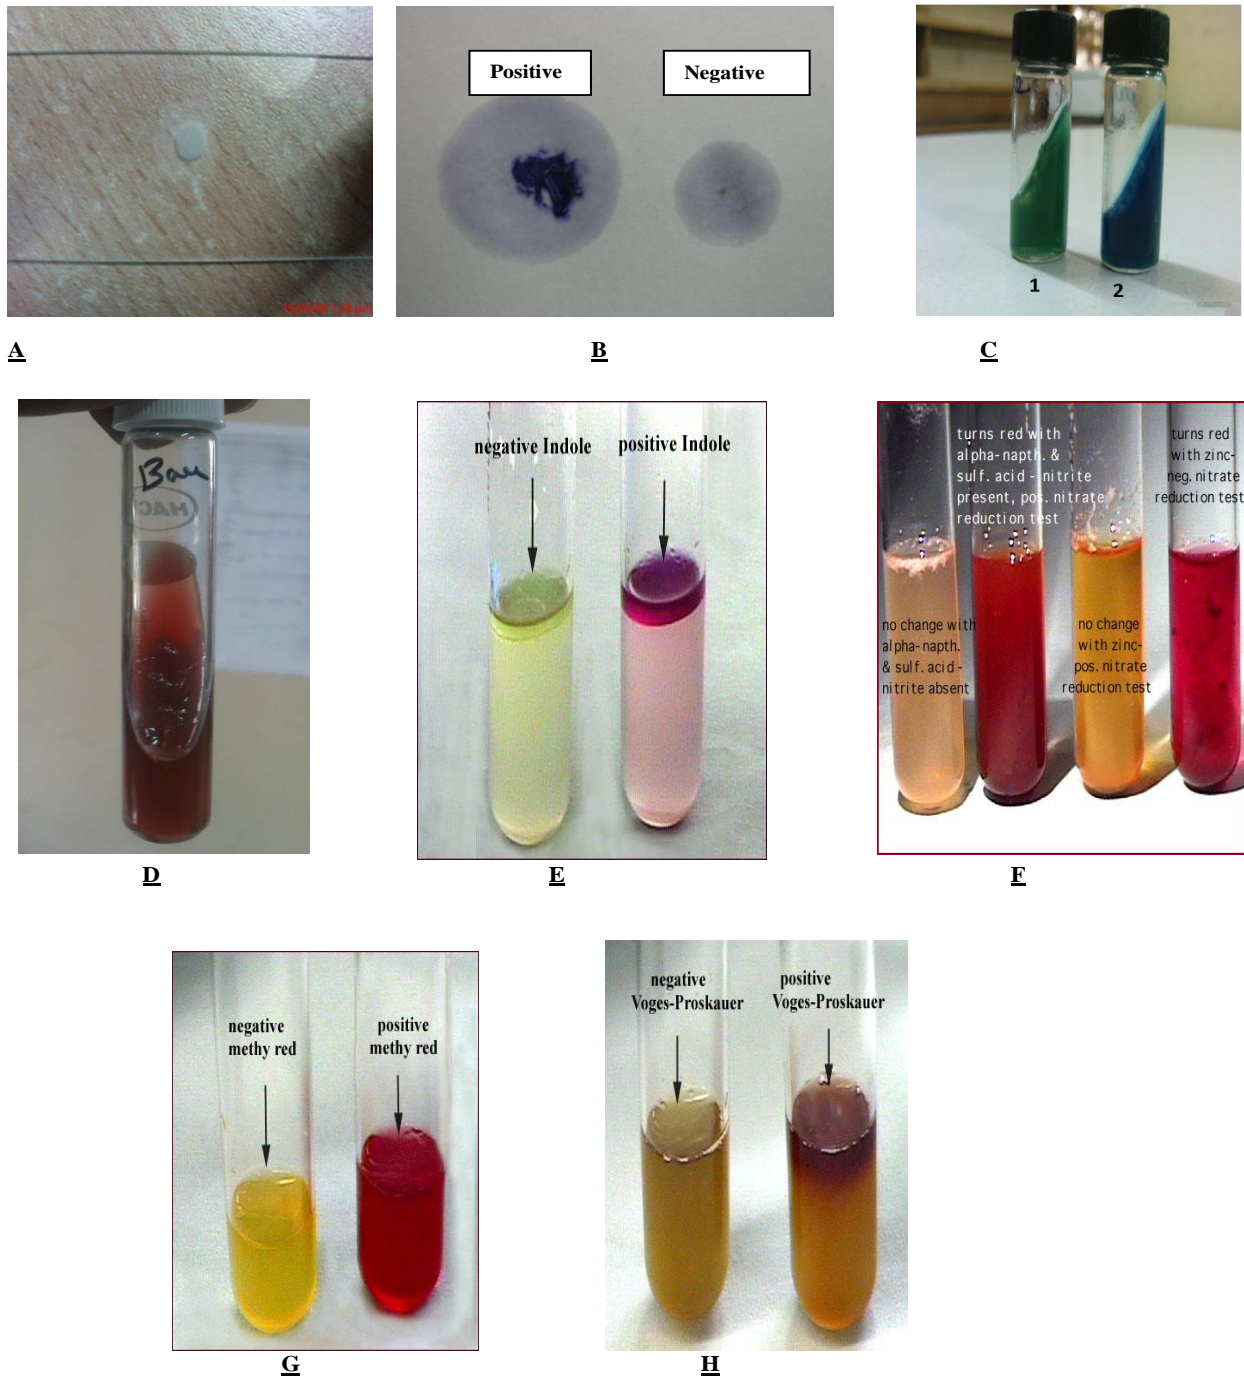

**Fig. (2).** Biochemical reaction test (A) Catalase test, (B) Oxidase test, (C) Citrate utilization test (1, negative; 2, positive), (D) TSI test (1, Alkaline; 2, alkaline), (E) Indole test, (F) Nitrate reduction test, (G) MR test, (H) VP test.

**Biochemical Identification of *Pseudomonas aeruginosa***

Extensive biochemical tests were performed to determine the biochemical behaviour of the isolates. The results are shown in the Tables (1, 2 and 3).

**Table 1. Biochemical characteristics of *P. aeruginosa* (Environmental Isolates).**

| Strain ID | Oxidase | Catalase | Citrate Utilization | TSI   |      |                  | MIU |   |   | MR-VP |    | Nitrate Reduction | Gelatin Liquefaction | Fluorescence activity | Hemolytic activity | Growth at 42°C |
|-----------|---------|----------|---------------------|-------|------|------------------|-----|---|---|-------|----|-------------------|----------------------|-----------------------|--------------------|----------------|
|           |         |          |                     | Slant | Butt | H <sub>2</sub> S | M   | I | U | MR    | VP |                   |                      |                       |                    |                |
| TW        | +       | +        | +                   | K     | K    | -                | +   | + | - | -     | +  | +                 | +                    | β                     | +                  |                |
| PS1       | +       | +        | +                   | K     | K    | -                | +   | + | - | -     | +  | +                 | +                    | β                     | +                  |                |

(Table 1) contd....

| Strain ID | Oxidase | Catalase | Citrate Utilization | TSI   |      |                  | MIU |   |   | MR-VP |    | Nitrate Reduction | Gelatin Liquefaction | Fluorescence activity | Hemolytic activity | Growth at 42°C |
|-----------|---------|----------|---------------------|-------|------|------------------|-----|---|---|-------|----|-------------------|----------------------|-----------------------|--------------------|----------------|
|           |         |          |                     | Slant | Butt | H <sub>2</sub> S | M   | I | U | MR    | VP |                   |                      |                       |                    |                |
| PS2       | +       | +        | +                   | K     | K    | -                | +   | - | + | -     | -  | +                 | +                    | +                     | β                  | +              |
| GW        | +       | +        | +                   | K     | K    | -                | +   | - | + | -     | -  | +                 | +                    | +                     | β                  | +              |
| SW        | +       | +        | +                   | K     | K    | -                | +   | - | + | -     | -  | +                 | +                    | +                     | β                  | +              |
| PO        | +       | +        | +                   | K     | K    | -                | +   | - | + | -     | -  | +                 | +                    | +                     | β                  | +              |
| BRW       | +       | +        | +                   | K     | K    | -                | +   | - | + | -     | -  | +                 | +                    | +                     | β                  | +              |
| DLW       | +       | +        | +                   | K     | K    | -                | +   | - | + | -     | -  | +                 | +                    | +                     | β                  | +              |
| MW1       | +       | +        | +                   | K     | K    | -                | +   | - | + | -     | -  | +                 | +                    | +                     | β                  | +              |
| MW2       | +       | +        | +                   | K     | K    | -                | +   | - | + | -     | -  | +                 | +                    | +                     | β                  | +              |

Table 2. Biochemical characteristics of *P. aeruginosa* (Clinical Isolates).

| Strain ID | Oxidase | Catalase | Citrate Utilization | TSI   |      |                  | MIU |   |   | MR-VP |    | Nitrate Reduction | Gelatin Liquefaction | Fluorescence activity | Hemolytic activity | Growth at 42°C |
|-----------|---------|----------|---------------------|-------|------|------------------|-----|---|---|-------|----|-------------------|----------------------|-----------------------|--------------------|----------------|
|           |         |          |                     | Slant | Butt | H <sub>2</sub> S | M   | I | U | MR    | VP |                   |                      |                       |                    |                |
| WS        | +       | +        | +                   | K     | K    | -                | +   | - | + | -     | -  | +                 | +                    | +                     | β                  | +              |
| PUS       | +       | +        | +                   | K     | K    | -                | +   | - | + | -     | -  | +                 | +                    | +                     | β                  | +              |
| SUR.PUS   | +       | +        | +                   | K     | K    | -                | +   | - | + | -     | -  | +                 | +                    | +                     | β                  | +              |
| BAN       | +       | +        | +                   | K     | K    | -                | +   | - | + | -     | -  | +                 | +                    | +                     | β                  | +              |

Table 3. Biochemical characteristics of *P.aeruginosa* (Food Isolates).

| Strain ID | Oxidase | Catalase | Citrate Utilization | TSI   |      |                  | MIU |   |   | MR-VP |    | Nitrate Reduction | Gelatin Liquefaction | Fluorescence activity | Hemolytic activity | Growth at 42°C |
|-----------|---------|----------|---------------------|-------|------|------------------|-----|---|---|-------|----|-------------------|----------------------|-----------------------|--------------------|----------------|
|           |         |          |                     | Slant | Butt | H <sub>2</sub> S | M   | I | U | MR    | VP |                   |                      |                       |                    |                |
| CN1       | +       | +        | +                   | K     | K    | -                | +   | - | + | -     | -  | +                 | +                    |                       | β                  |                |
| CN2       | +       | +        | +                   | K     | K    | -                | +   | - | + | -     | -  | +                 | +                    |                       | β                  |                |
| FM        | +       | +        | +                   | K     | K    | -                | +   | - | + | -     | -  | +                 | +                    |                       | β                  |                |

Symbols: K: Alkaline reaction, '+': Positive, '-': Negative, β: Beta

© 2018 Bhuiya *et al.*

This is an open access article distributed under the terms of the Creative Commons Attribution 4.0 International Public License (CC-BY 4.0), a copy of which is available at: (<https://creativecommons.org/licenses/by/4.0/legalcode>). This license permits unrestricted use, distribution, and reproduction in any medium, provided the original author and source are credited.
